# Supplementary material
Source: Royal Society of Chemistry journal article supplement (doi:10.1039/d6ma00171h)
Supplement: d6ma00171h2.pdf [file d6ma00171h2.pdf]

## Supplementary information

### Large-scale tubular protonic ceramic electrolysis cells made by injection molding

You-Dong Kim,<sup>a</sup> Javishk Shah,<sup>b</sup> Christopher Schiller,<sup>c</sup> Ryan O'Hayre,<sup>a</sup> Sandrine Ricote <sup>\*bd</sup>

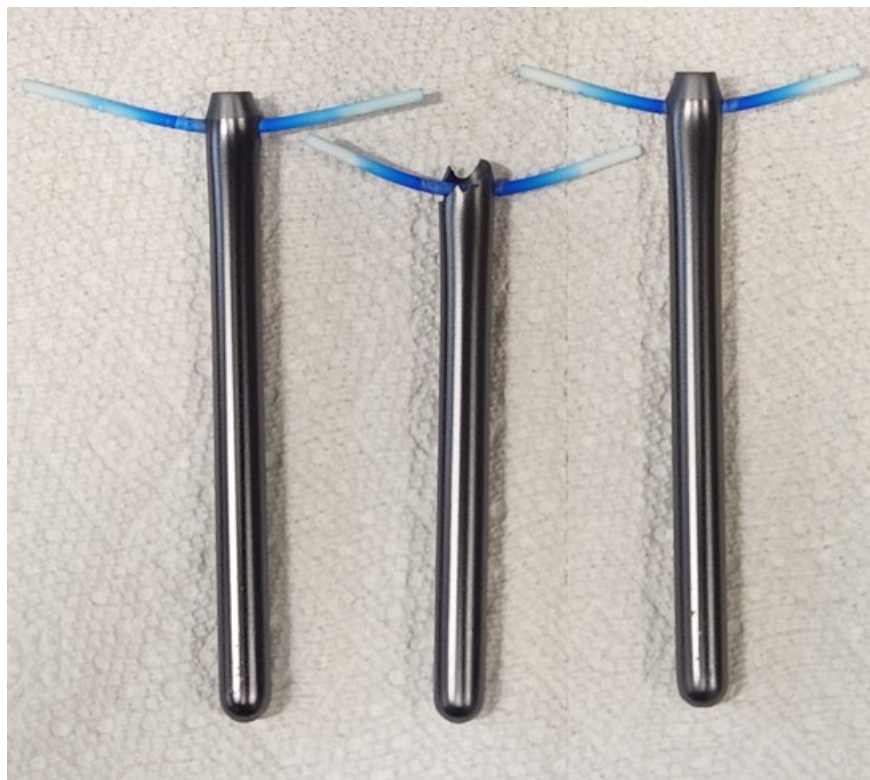

Figure S1: Sintered NiO-BCZYYb7111//BCZYYb7111 with the hanging alumina rods.

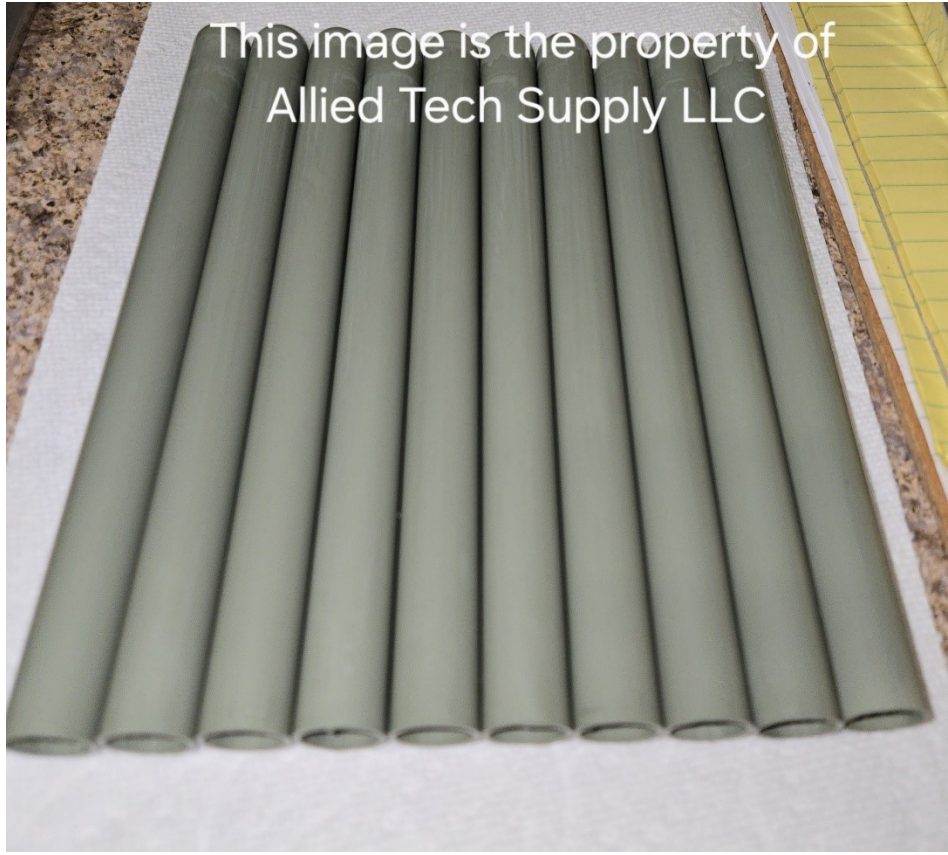

Figure S2: Production of 10 high-quality injection molded NiO-BCZYYb7111 tubes, before bisque-firing.

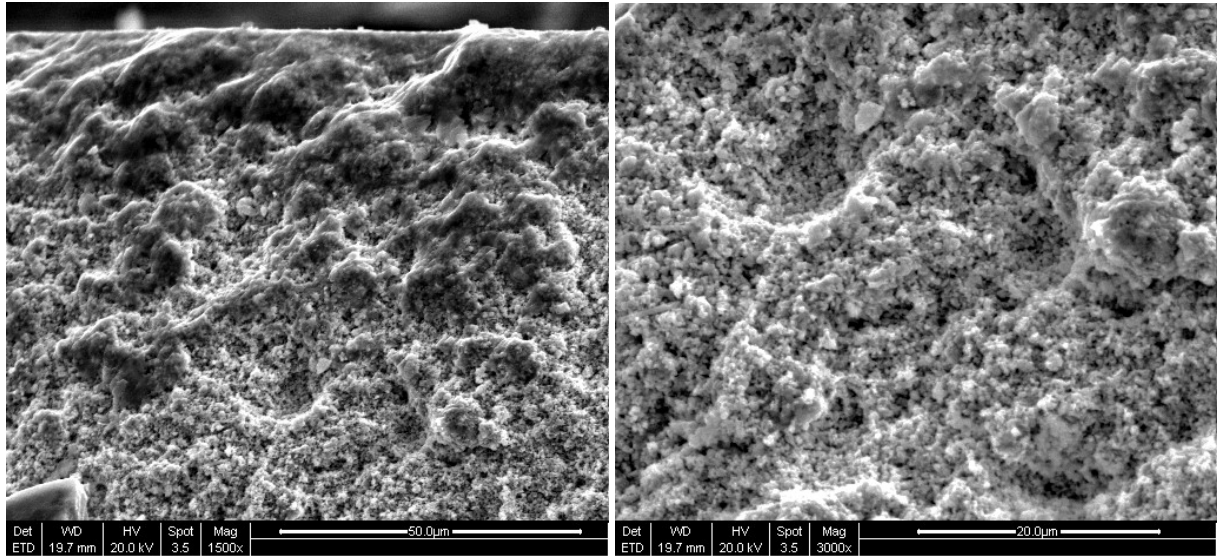

Figure S3: SEM of a fractured NiO-BCZYYb7111 bisque-fired tube.

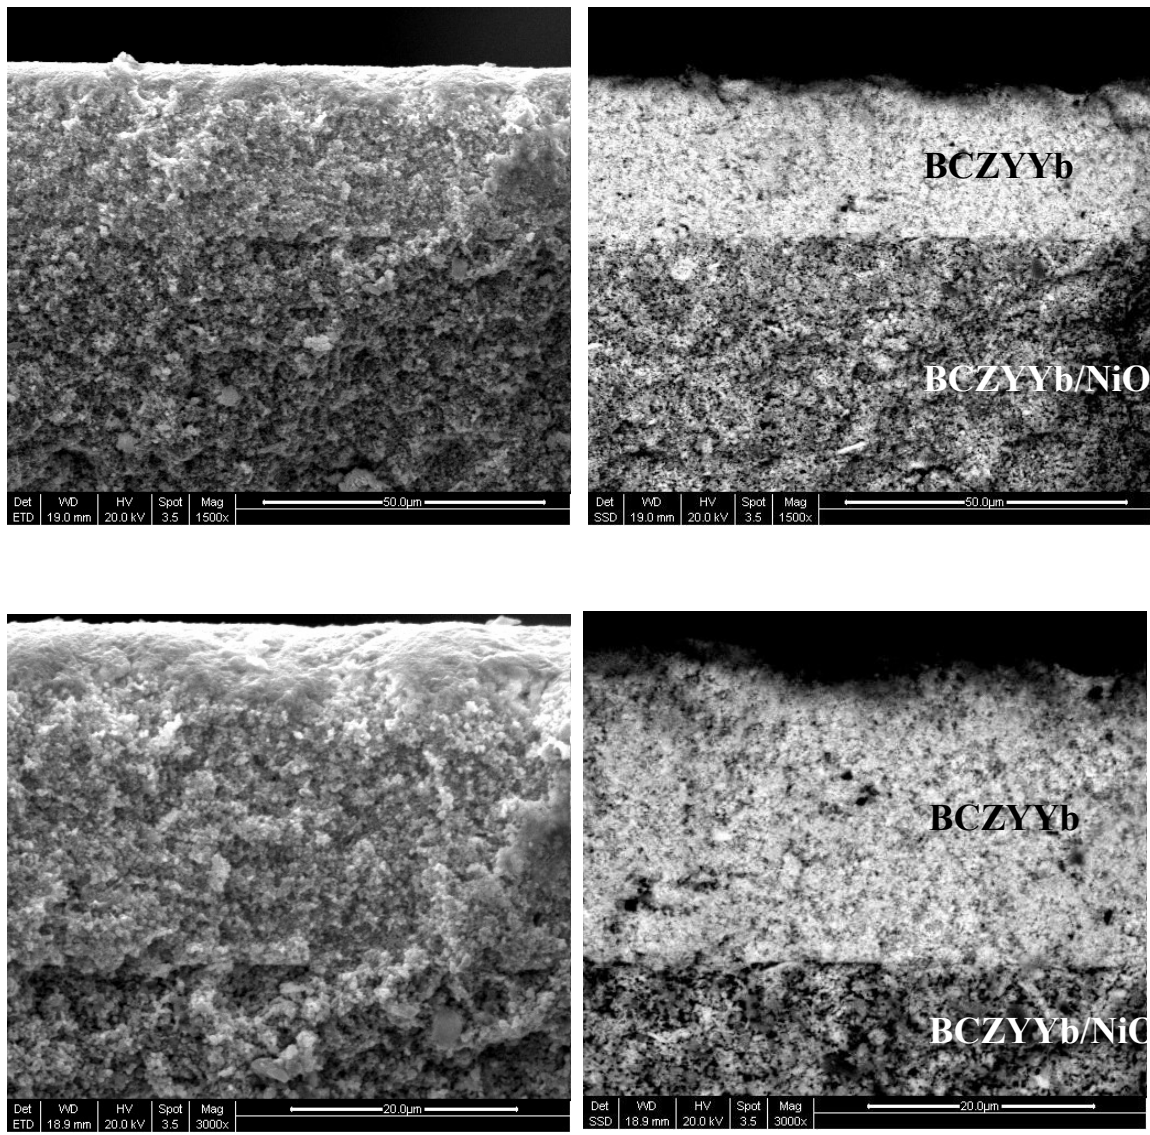

Figure S4: SEM of fractured dip-coated tube (NiO-BCZYYb7111//BCZYYb7111) before sintering. Left: secondary electron micrographs, right: backscattered electron micrographs.

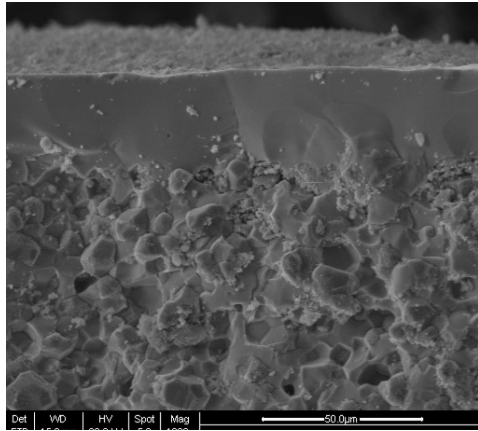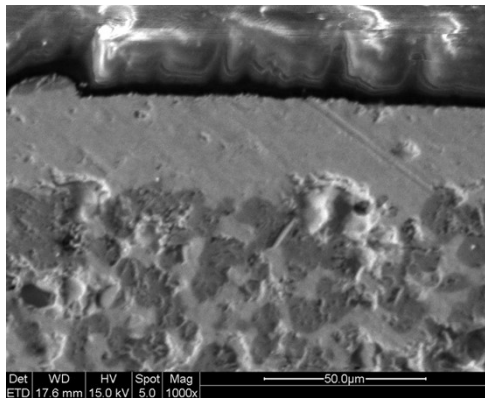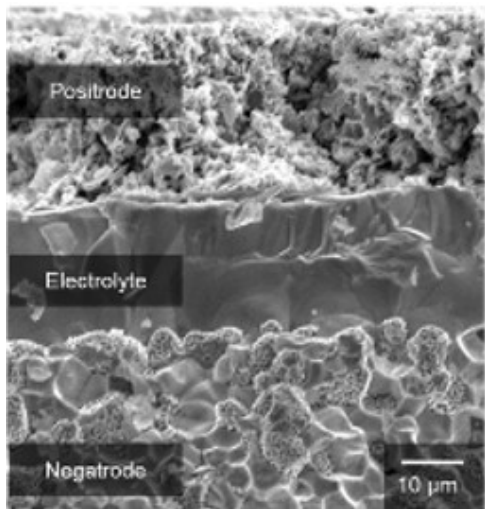

Figure S5. Homogeneous thickness over several tubes that were dip-coated and co-sintered. From top to bottom the electrolyte thickness averages 30 microns, 31 microns, and 24 microns.

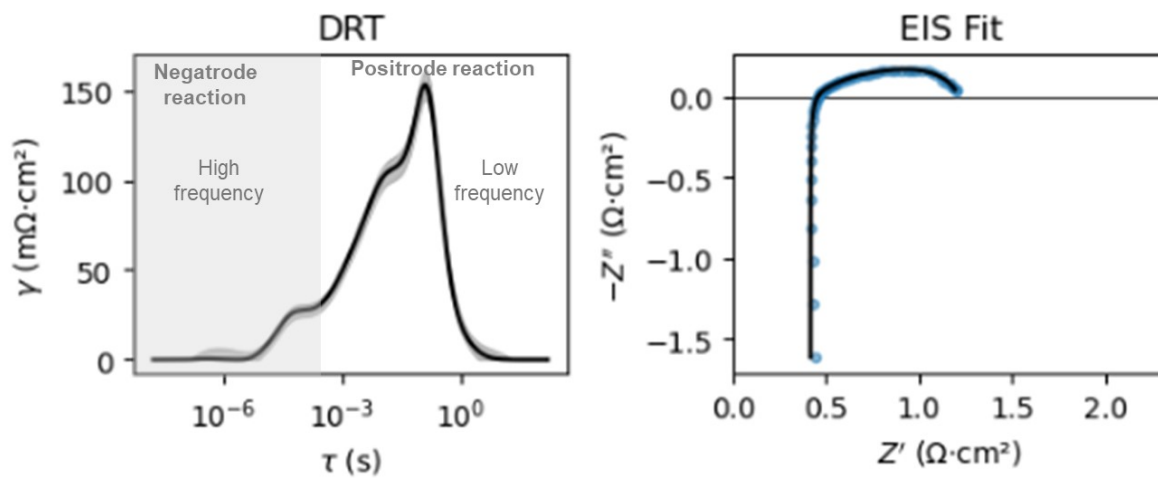

Figure S6. DRT and EIS plot of the 20 cm<sup>2</sup> injected tubular cell at 600°C.

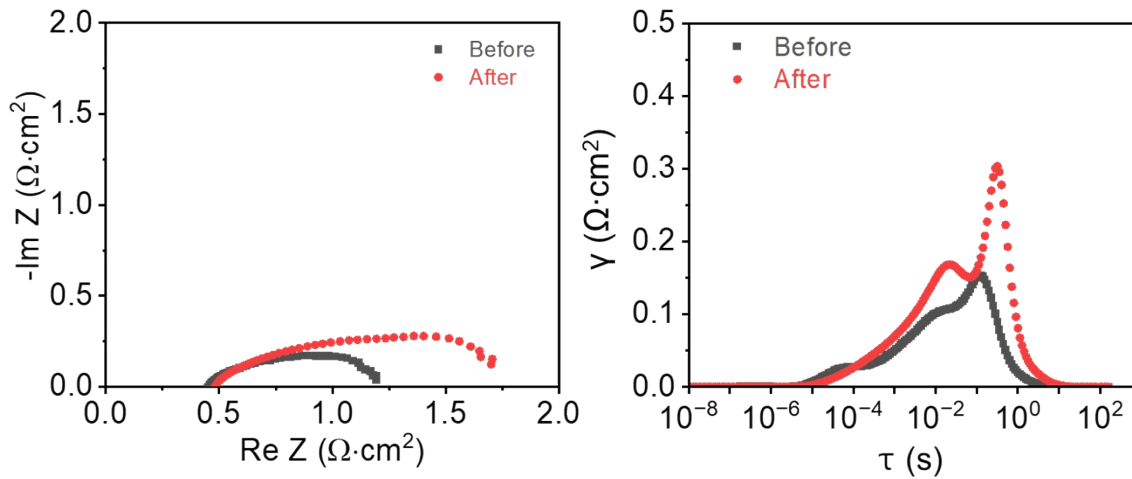

Figure S7. EIS and DRT plot before and after durability test.
